# Supplementary material
Source: Springer Nature journal article supplement (https://www.springermedizin.de/resource/supplementary/12911_2010_382_MOESM5_ESM.pdf/9525710)
Supplement: MOESM5 [file 9525710]

*IF there exists a MethadoneOrder AND a CoprescriptionOrder for patient p  
Where p.CoprescriptionOrder.drug is-in MethadoneInteraction*

*Then {*

*IF p.CoprescriptionOrder.drug is-a MethadoneInteraction.inducers  
THEN p.MethadoneOrder.dose = p.MethadoneOrder.dose \* 150%*

*AND*

*IF p.CoprescriptionOrder.drug is-a MethadoneInteraction.inhibitors  
THEN p.MethadoneOrder.dose = p.MethadoneOrder.dose \* 50% }*
